# Supplementary material for: Sensory Evaluation and Model Prediction of Vacuum-Packed Fresh Corn during Long-Term Storage
Source: MDPI journal article supplement (doi:10.3390/foods12030478), 2023-01-19
Supplement: s1 [file s1]

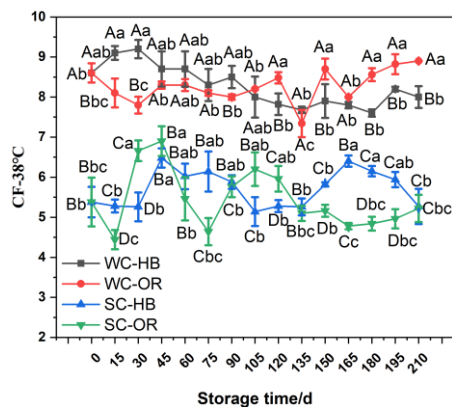

(A1)

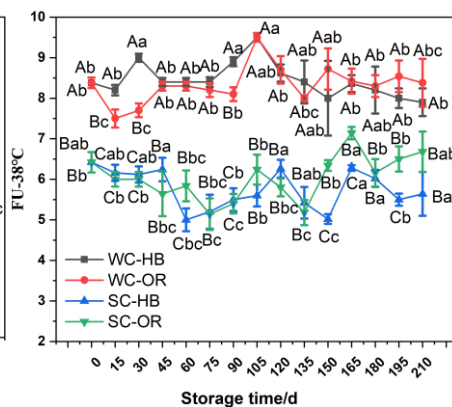

(B1)

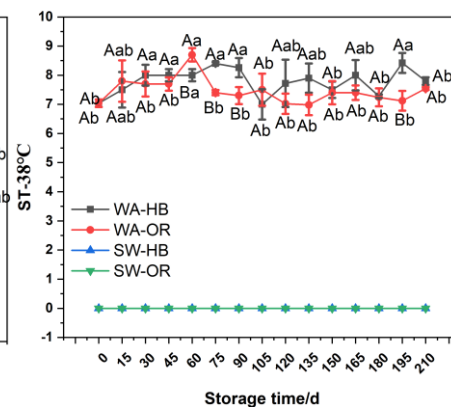

(C1)

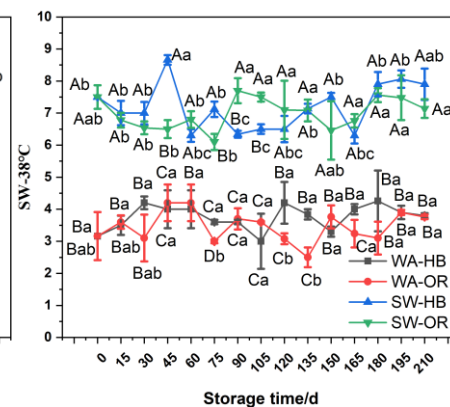

(D1)

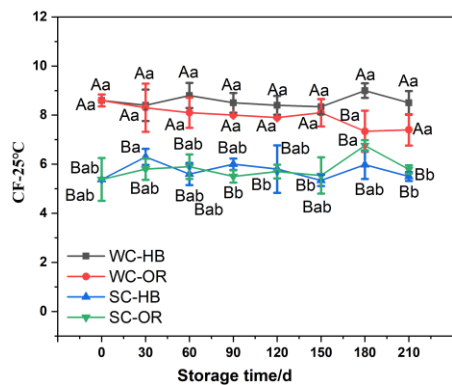

(A2)

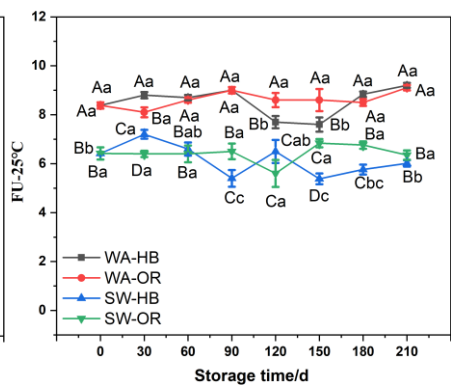

(B2)

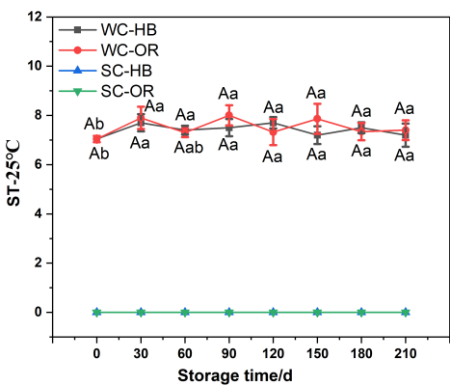

(C2)

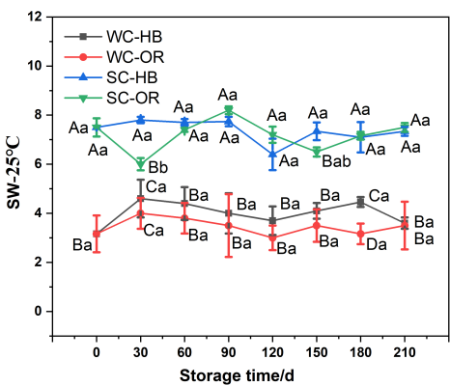

(D2)

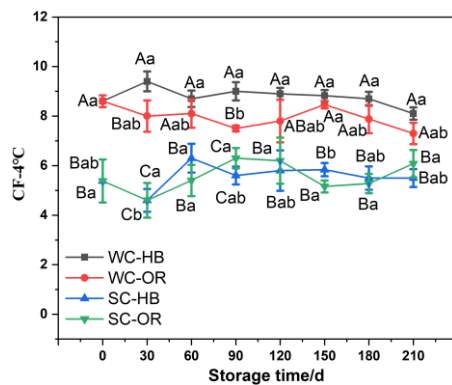

(A3)

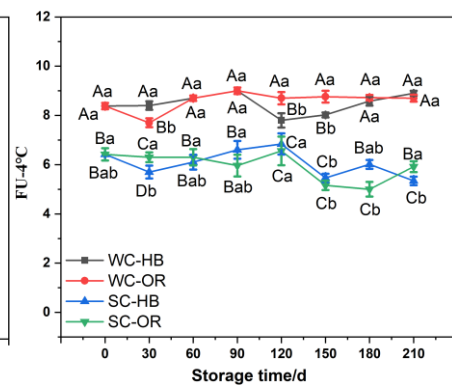

(B3)

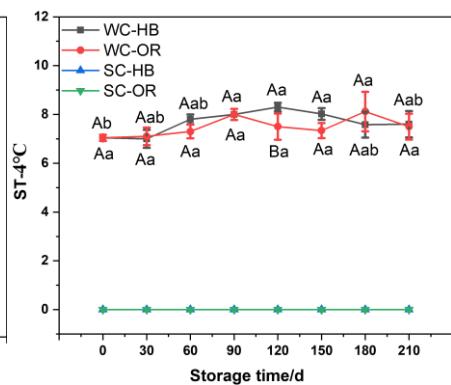

(C3)

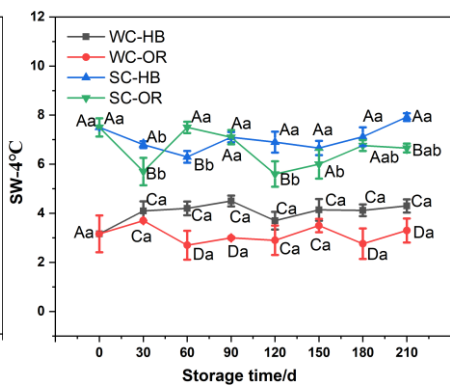

(D3)

**Figure S1.** Corn flavor (A), fullness (B), stickiness (C), and sweetness (SW) of fresh corn packaged with high-barrier and ordinary composite films at three storage temperatures from 0 to 210 days. Different capital letters (A–D) indicate that the significant differences ( $p < 0.05$ ) between different treatments at the same storage time. Different lowercase letters (a–c) indicate that the significant differences ( $p < 0.05$ ) between different storage time for same treatment. Duncan's test was used to analyze differences between groups. WC-HB indicates that the waxy corn packed in high-barrier nylon/nylon/PP composite film. WC-OR indicates that the waxy corn packed in ordinary nylon/nylon/PP composite film. SC-HB indicates that the sweet corn packed in high-barrier nylon/nylon/PP composite film. SC-OR indicates that the sweet corn packed in ordinary nylon/nylon/PP composite film. CF (A), FU (B), ST(C) and SW(D) indicates that the characteristic sensory quality of corn flavor (CF), fullness (FU), stickiness (ST) and sweetness (SW) respectively.

**Table S1.** Reaction rate constant and determination coefficient based on the characteristic indexes of fresh corn samples at different temperatures.

| Sample | Characteristic index | Storage method | Temperature/°C | Zero-order reaction     |        |                | First-order reaction    |        |                |
|--------|----------------------|----------------|----------------|-------------------------|--------|----------------|-------------------------|--------|----------------|
|        |                      |                |                | equation                | k      | R <sup>2</sup> | equation                | k      | R <sup>2</sup> |
| SC     | color changes        | HB             | 4°C            | $y = 0.0789x - 1.3346$  | 0.0789 | 0.983          | $y = 0.0452e^{0.0351x}$ | 0.0351 | 0.5915         |
|        |                      |                | 25°C           | $y = 0.0952x + 0.1071$  | 0.0952 | 0.991          | $y = 0.0993e^{0.0326x}$ | 0.0326 | 0.5239         |
|        |                      |                | 38°C           | $y = 0.1132x + 0.3877$  | 0.1132 | 0.9921         | $y = 0.4099e^{0.025x}$  | 0.025  | 0.6229         |
|        |                      | OR             | 4°C            | $y = 0.0899x - 0.8071$  | 0.0899 | 0.9952         | $y = 0.0778e^{0.0332x}$ | 0.0332 | 0.65           |
|        |                      |                | 25°C           | $y = 0.1026x - 0.1004$  | 0.1026 | 0.9966         | $y = 0.0988e^{0.033x}$  | 0.033  | 0.5627         |
|        |                      |                | 38°C           | $y = 0.1427x + 0.0772$  | 0.1427 | 0.9984         | $y = 0.4867e^{0.0253x}$ | 0.0253 | 0.6938         |
|        | GL                   | HB             | 4°C            | $y = -0.0246x + 8.9667$ | -0.025 | 0.9785         | $y = 9.3384e^{-0.004x}$ | -0.004 | 0.9755         |
|        |                      |                | 25°C           | $y = -0.031x + 8.7333$  | -0.031 | 0.9807         | $y = 9.4262e^{-0.006x}$ | -0.006 | 0.9912         |
|        |                      |                | 38°C           | $y = -0.0472x + 8.3571$ | -0.047 | 0.959          | $y = 14.522e^{-0.019x}$ | -0.019 | 0.9184         |
|        |                      | OR             | 4°C            | $y = -0.0333x + 8.9333$ | -0.033 | 0.9374         | $y = 9.5846e^{-0.006x}$ | -0.006 | 0.9606         |
|        |                      |                | 25°C           | $y = -0.0421x + 8.8083$ | -0.042 | 0.9873         | $y = 12.815e^{-0.014x}$ | -0.014 | 0.9079         |
|        |                      |                | 38°C           | $y = -0.0476x + 8.2531$ | -0.048 | 0.9487         | $y = 19.686e^{-0.025x}$ | -0.025 | 0.8583         |
| WC     | color changes        | HB             | 4°C            | $y = 0.0304x - 0.3292$  | 0.0304 | 0.989          | $y = 0.1055e^{0.0238x}$ | 0.0238 | 0.76           |
|        |                      |                | 25°C           | $y = 0.0346x + 0.1958$  | 0.0346 | 0.9824         | $y = 0.1539e^{0.0232x}$ | 0.0232 | 0.6152         |
|        |                      |                | 38°C           | $y = 0.047x + 0.3504$   | 0.047  | 0.9724         | $y = 0.3386e^{0.0205x}$ | 0.0205 | 0.6243         |
|        |                      | OR             | 4°C            | $y = 0.0326x + 0.3708$  | 0.0326 | 0.9877         | $y = 0.1774e^{0.0222x}$ | 0.0222 | 0.676          |
|        |                      |                | 25°C           | $y = 0.0442x + 0.4958$  | 0.0442 | 0.9774         | $y = 0.2014e^{0.0234x}$ | 0.0234 | 0.5824         |
|        |                      |                | 38°C           | $y = 0.0662x + 0.6023$  | 0.0662 | 0.9814         | $y = 0.3349e^{0.0291x}$ | 0.0291 | 0.6527         |
| WC     | color changes        | HB             | 4°C            | $y = 0.0599x - 0.6788$  | 0.0599 | 0.986          | $y = 0.0534e^{0.0327x}$ | 0.0327 | 0.5865         |
|        |                      |                | 25°C           | $y = 0.0711x - 0.1254$  | 0.0711 | 0.9911         | $y = 0.081e^{0.0318x}$  | 0.0318 | 0.5599         |
|        |                      |                | 38°C           | $y = 0.0732x + 0.2465$  | 0.0732 | 0.9866         | $y = 0.3053e^{0.024x}$  | 0.024  | 0.6464         |
|        |                      | OR             | 4°C            | $y = 0.0736x + 0.3154$  | 0.0736 | 0.9956         | $y = 0.0978e^{0.0312x}$ | 0.0312 | 0.5942         |
|        |                      |                | 25°C           | $y = 0.0999x - 0.3346$  | 0.0999 | 0.9906         | $y = 0.0877e^{0.0334x}$ | 0.0334 | 0.5313         |

|    |    |      |                         |        |        |                      |        |        |
|----|----|------|-------------------------|--------|--------|----------------------|--------|--------|
| GL | HB | 38°C | $y = 0.1146x + 5.4905$  | 0.1146 | 0.8198 | $y = 0.7329e0.0233x$ | 0.0233 | 0.3678 |
|    |    | 4°C  | $y = -0.0204x + 9.7$    | -0.02  | 0.9743 | $y = 9.9849e-0.003x$ | -0.003 | 0.9418 |
|    |    | 25°C | $y = -0.0281x + 9.6583$ | -0.028 | 0.9888 | $y = 10.277e-0.005x$ | -0.005 | 0.9522 |
|    | OR | 38°C | $y = -0.0429x + 9.2275$ | -0.043 | 0.9705 | $y = 11.805e-0.011x$ | -0.011 | 0.9353 |
|    |    | 4°C  | $y = 0.0346x + 0.6571$  | 0.0346 | 0.9889 | $y = 0.8788e0.0143x$ | 0.0143 | 0.8648 |
|    |    | 25°C | $y = 0.0408x + 0.8083$  | 0.0408 | 0.992  | $y = 1.1738e0.0114x$ | 0.0114 | 0.8657 |
| SO | HB | 38°C | $y = 0.0431x + 1.8101$  | 0.0431 | 0.9615 | $y = 1.8944e0.0097x$ | 0.0097 | 0.8099 |
|    |    | 4°C  | $y = 0.0247x - 0.2913$  | 0.0247 | 0.9883 | $y = 0.0338e0.0299x$ | 0.0299 | 0.6799 |
|    |    | 25°C | $y = 0.0319x + 0.1754$  | 0.0319 | 0.9807 | $y = 0.0566e0.0293x$ | 0.0293 | 0.5235 |
|    | OR | 38°C | $y = 0.044x + 0.2517$   | 0.044  | 0.9871 | $y = 0.1205e0.0271x$ | 0.0271 | 0.5837 |
|    |    | 4°C  | $y = 0.0281x + 0.1838$  | 0.0281 | 0.9804 | $y = 0.0581e0.0284x$ | 0.0284 | 0.6206 |
|    |    | 25°C | $y = 0.0441x + 0.4338$  | 0.0441 | 0.9894 | $y = 0.0786e0.0295x$ | 0.0295 | 0.5949 |
|    |    | 38°C | $y = 0.061x + 0.4718$   | 0.061  | 0.983  | $y = 0.09e0.0379x$   | 0.0379 | 0.5323 |

Note: K denotes the slope of the fitting curve. R<sup>2</sup> denotes the coefficient of determination of the models, SC and WC indicate the fresh sweet corn samples and the fresh waxy corn samples. SO and GL indicates that the characteristic sensory quality of sourness (SO) and glossiness (GL) respectively. HB and OR indicates that the packaging materials of high-barrier nylon/nylon/PP composite film and ordinary nylon/nylon/PP composite film respectively.

**Table S2.** Changes in the content of soluble sugars in samples store at 4 °C from 0 to 210 days.

| Sample | 0d                      | 30d                     | 60d                     | 90d                     | 120d                     | 150d                     | 180d                     | 210d                     |
|--------|-------------------------|-------------------------|-------------------------|-------------------------|--------------------------|--------------------------|--------------------------|--------------------------|
| WC-HB  | 4.25±0.08 <sup>Ba</sup> | 4.61±0.51 <sup>Ba</sup> | 3.62±0.06 <sup>Db</sup> | 4.40±0.05 <sup>Ba</sup> | 3.21±0.04 <sup>Cb</sup>  | 3.92±0.54 <sup>Ba</sup>  | 3.21±0.51 <sup>Bb</sup>  | 4.21±0.41 <sup>Ba</sup>  |
| WC-OR  | 4.25±0.08 <sup>Ba</sup> | 4.55±0.39 <sup>Ca</sup> | 4.09±0.09 <sup>Ca</sup> | 3.84±0.12 <sup>Cb</sup> | 4.01±0.15 <sup>Bab</sup> | 4.34±0.17 <sup>Ba</sup>  | 3.27±0.27 <sup>Bc</sup>  | 3.91±0.24 <sup>Bab</sup> |
| SC-HB  | 6.58±0.12 <sup>Ab</sup> | 7.01±0.08 <sup>Aa</sup> | 7.02±0.05 <sup>Ba</sup> | 6.94±0.14 <sup>Aa</sup> | 7.01±0.11 <sup>Aa</sup>  | 6.91±0.24 <sup>Aab</sup> | 6.81±0.34 <sup>Aab</sup> | 6.99±0.41 <sup>Aab</sup> |
| SC-OR  | 6.58±0.12 <sup>Ab</sup> | 7.12±0.10 <sup>Aa</sup> | 7.51±0.32 <sup>Aa</sup> | 7.12±0.03 <sup>Aa</sup> | 6.97±0.15 <sup>Aa</sup>  | 7.01±0.31 <sup>Aa</sup>  | 7.13±0.18 <sup>Aa</sup>  | 7.09±0.95 <sup>Aab</sup> |

Note: Different capital letters (A–D) indicate that the significant differences ( $p < 0.05$ ) between different treatments at the same storage time. Different lowercase letters (a–c) indicate that the significant differences ( $p < 0.05$ ) between different storage time for same treatment. Duncan's test was used to analyze differences between groups. WC-HB indicates that the waxy corn packed in high-barrier nylon/nylon/PP composite film. WC-OR indicates that the waxy corn packed in ordinary ny-lon/nylon/PP composite film. SC-HB indicates that the sweet corn packed in high-barrier ny-lon/nylon/PP composite film. SC-OR indicates that the sweet corn packed in ordinary ny-lon/nylon/PP composite film.

**Table S3.** Changes in the content of soluble sugars in samples store at 25°C from 0 to 210 days.

| Sample | 0d                      | 30d                      | 60d                     | 90d                      | 120d                     | 150d                     | 180d                     | 210d                     |
|--------|-------------------------|--------------------------|-------------------------|--------------------------|--------------------------|--------------------------|--------------------------|--------------------------|
| WC-HB  | 4.25±0.08 <sup>Bb</sup> | 4.82±0.25 <sup>Ba</sup>  | 4.09±0.18 <sup>Bb</sup> | 4.32±0.35 <sup>Bb</sup>  | 3.54±0.34 <sup>Cc</sup>  | 4.19±0.34 <sup>Bbc</sup> | 4.01±0.16 <sup>Bb</sup>  | 4.22±0.05 <sup>Bb</sup>  |
| WC-OR  | 4.25±0.08 <sup>Ba</sup> | 4.29±0.64 <sup>Bab</sup> | 3.92±0.16 <sup>Bb</sup> | 4.02±0.25 <sup>Bab</sup> | 3.81±0.29 <sup>Cab</sup> | 3.99±0.34 <sup>Bab</sup> | 4.02±0.35 <sup>Bab</sup> | 4.15±0.21 <sup>Bab</sup> |
| SC-HB  | 6.58±0.12 <sup>Ab</sup> | 7.19±0.26 <sup>Aab</sup> | 7.29±0.10 <sup>Aa</sup> | 6.80±0.24 <sup>Ab</sup>  | 6.72±0.13 <sup>Bb</sup>  | 6.81±0.42 <sup>Aab</sup> | 6.72±0.14 <sup>Ab</sup>  | 6.88±0.24 <sup>Ab</sup>  |
| SC-OR  | 6.58±0.12 <sup>Ab</sup> | 7.30±0.37 <sup>Aab</sup> | 7.48±0.23 <sup>Aa</sup> | 7.12±0.23 <sup>Aab</sup> | 7.21±0.08 <sup>Aa</sup>  | 6.75±0.27 <sup>Ab</sup>  | 6.65±0.23 <sup>Ab</sup>  | 6.57±0.51 <sup>Ab</sup>  |

Note: Different capital letters (A–D) indicate that the significant differences ( $p < 0.05$ ) between different treatments at the same storage time. Different lowercase letters (a–c) indicate that the significant differences ( $p < 0.05$ ) between different storage time for same treatment. Duncan's test was used to analyze differences between groups. WC-HB indicates that the waxy corn packed in high-barrier nylon/nylon/PP composite film. WC-OR indicates that the waxy corn packed in ordinary ny-lon/nylon/PP composite film. SC-HB indicates that the sweet corn packed in high-barrier ny-lon/nylon/PP composite film. SC-OR indicates that the sweet corn packed in ordinary ny-lon/nylon/PP composite film.

**Table S4.** Changes in the content of soluble sugars in samples store at 38°C from 0 to 210 days.

| Sample | WC-HB                     | WC-OR                    | SC-HB                     | SC-OR                     |
|--------|---------------------------|--------------------------|---------------------------|---------------------------|
| 0d     | 4.25±0.08 <sup>Bc</sup>   | 4.25±0.08 <sup>Ba</sup>  | 6.58±0.12 <sup>Ac</sup>   | 6.58±0.12 <sup>Ac</sup>   |
| 15d    | 4.55±0.37 <sup>Babc</sup> | 4.25±0.42 <sup>Ba</sup>  | 6.84±0.29 <sup>Aab</sup>  | 6.91±0.57 <sup>Aabc</sup> |
| 30d    | 5.02±0.19 <sup>Ba</sup>   | 4.67±0.09 <sup>Ca</sup>  | 6.94±0.29 <sup>Aab</sup>  | 7.06±0.55 <sup>Aabc</sup> |
| 45d    | 4.49±0.13 <sup>Bbc</sup>  | 4.51±0.09 <sup>Ba</sup>  | 7.49±0.35 <sup>Aa</sup>   | 7.15±0.21 <sup>Aabc</sup> |
| 60d    | 4.37±0.05 <sup>Cb</sup>   | 4.68±0.09 <sup>Ba</sup>  | 7.17±0.31 <sup>Aab</sup>  | 6.94±0.11 <sup>Ab</sup>   |
| 75d    | 4.12±0.13 <sup>Bcd</sup>  | 3.93±0.20 <sup>Bbc</sup> | 7.15±0.07 <sup>Aa</sup>   | 7.32±0.08 <sup>Aab</sup>  |
| 90d    | 4.01±0.06 <sup>Cd</sup>   | 4.21±0.18 <sup>Ca</sup>  | 7.23±0.14 <sup>Aa</sup>   | 6.88±0.09 <sup>Bb</sup>   |
| 105d   | 4.05±0.13 <sup>Bcd</sup>  | 3.55±0.37 <sup>Bc</sup>  | 7.17±0.50 <sup>Aab</sup>  | 6.97±0.24 <sup>Ab</sup>   |
| 120d   | 3.21±0.34 <sup>Ce</sup>   | 4.21±0.15 <sup>Bab</sup> | 6.82±0.31 <sup>Aab</sup>  | 7.13±0.55 <sup>Aabc</sup> |
| 135d   | 4.47±0.17 <sup>Bb</sup>   | 4.33±0.17 <sup>Ba</sup>  | 6.67±0.18 <sup>Abc</sup>  | 6.58±0.42 <sup>Abc</sup>  |
| 150d   | 4.57±0.24 <sup>Bbc</sup>  | 4.29±0.21 <sup>Ba</sup>  | 7.11±0.57 <sup>Aab</sup>  | 7.01±0.91 <sup>Aabc</sup> |
| 165d   | 4.14±0.14 <sup>Bcd</sup>  | 4.33±0.09 <sup>Ba</sup>  | 6.97±0.15 <sup>Aab</sup>  | 6.61±0.72 <sup>Aabc</sup> |
| 180d   | 4.23±0.19 <sup>Bbc</sup>  | 4.51±0.64 <sup>Ba</sup>  | 6.79±0.68 <sup>Aabc</sup> | 6.83±0.49 <sup>Aabc</sup> |
| 195d   | 4.17±0.05 <sup>Bcd</sup>  | 3.90±0.30 <sup>Bab</sup> | 7.02±0.51 <sup>Aab</sup>  | 6.89±0.87 <sup>Aabc</sup> |
| 210d   | 4.08±0.12 <sup>Bcd</sup>  | 4.14±0.21 <sup>Bab</sup> | 6.99±0.34 <sup>Aab</sup>  | 6.84±0.62 <sup>Aabc</sup> |

Note: Different capital letters (A–C) indicate that the significant differences ( $p < 0.05$ ) between different treatments at the same storage time. Different lowercase letters (a–d) indicate that the significant differences ( $p < 0.05$ ) between different storage time for same treatment. Duncan's test was used to analyze differences between groups. WC-HB indicates that the waxy corn packed in high-barrier nylon/nylon/PP composite film. WC-OR indicates that the waxy corn packed in ordinary ny-lon/nylon/PP composite film. SC-HB indicates that the sweet corn packed in high-barrier ny-lon/nylon/PP composite film. SC-OR indicates that the sweet corn packed in ordinary ny-lon/nylon/PP composite film.

**Table S5.** Changes in the content of starch in samples store at 4°C from 0 to 210 days.

| Sample | 0d                        | 30d                       | 60d                       | 90d                      | 120d                      | 150d                      | 180d                     | 210d                     |
|--------|---------------------------|---------------------------|---------------------------|--------------------------|---------------------------|---------------------------|--------------------------|--------------------------|
| WC-HB  | 36.74±0.99 <sup>Aa</sup>  | 32.18±0.64 <sup>Bc</sup>  | 32.62±0.60 <sup>Bbc</sup> | 31.40±0.58 <sup>Ac</sup> | 32.67±0.17 <sup>Bbc</sup> | 33.27±0.59 <sup>Bb</sup>  | 36.24±0.92 <sup>Aa</sup> | 37.22±0.25 <sup>Aa</sup> |
| WC-OR  | 36.74±0.99 <sup>Aab</sup> | 35.21±0.47 <sup>Aab</sup> | 36.18±0.29 <sup>Aa</sup>  | 29.84±1.12 <sup>Ad</sup> | 34.16±0.45 <sup>Ac</sup>  | 36.14±0.93 <sup>Aab</sup> | 35.27±0.62 <sup>Ab</sup> | 35.27±0.47 <sup>Bb</sup> |
| SC-HB  | 6.39±0.30 <sup>Ba</sup>   | 6.49±0.57 <sup>Ca</sup>   | 6.22±0.54 <sup>Ca</sup>   | 6.34±0.14 <sup>Ba</sup>  | 6.33±0.99 <sup>Ca</sup>   | 6.61±0.31 <sup>Ca</sup>   | 6.29±0.58 <sup>Ba</sup>  | 6.43±0.31 <sup>Ca</sup>  |
| SC-OR  | 6.39±0.30 <sup>Ba</sup>   | 5.95±0.65 <sup>Ca</sup>   | 6.12±0.61 <sup>Ca</sup>   | 6.22±0.08 <sup>Ba</sup>  | 6.27±0.21 <sup>Ca</sup>   | 6.24±0.18 <sup>Ca</sup>   | 6.16±0.81 <sup>Ba</sup>  | 6.39±0.94 <sup>Ca</sup>  |

Note: Different capital letters (A–C) indicate that the significant differences ( $p < 0.05$ ) between different treatments at the same storage time. Different lowercase letters (a–d) indicate that the significant differences ( $p < 0.05$ ) between different storage time for same treatment. Duncan's test was used to analyze differences between groups. WC-HB indicates that the waxy corn packed in high-barrier nylon/nylon/PP composite film. WC-OR indicates that the waxy corn packed in ordinary ny-lon/nylon/PP composite film. SC-HB indicates that the sweet corn packed in high-barrier ny-lon/nylon/PP composite film. SC-OR indicates that the sweet corn packed in ordinary ny-lon/nylon/PP composite film.

**Table S6.** Changes in the content of starch in samples store at 25°C from 0 to 210 days.

| Sample | 0d                        | 30d                      | 60d                      | 90d                      | 120d                     | 150d                     | 180d                     | 210d                      |
|--------|---------------------------|--------------------------|--------------------------|--------------------------|--------------------------|--------------------------|--------------------------|---------------------------|
| WC-HB  | 36.74±0.99 <sup>Aab</sup> | 33.21±0.21 <sup>Ac</sup> | 30.71±0.82 <sup>Ad</sup> | 30.95±0.16 <sup>Ad</sup> | 33.59±0.34 <sup>Ac</sup> | 33.25±0.27 <sup>Bc</sup> | 36.24±0.57 <sup>Ab</sup> | 37.22±0.25 <sup>Aa</sup>  |
| WC-OR  | 36.74±0.99 <sup>Aa</sup>  | 32.99±1.01 <sup>Ab</sup> | 30.23±0.11 <sup>Ac</sup> | 29.52±0.71 <sup>Bc</sup> | 34.27±1.11 <sup>Ab</sup> | 36.91±0.73 <sup>Aa</sup> | 34.27±0.99 <sup>Bb</sup> | 35.56±1.24 <sup>Bab</sup> |
| SC-HB  | 6.39±0.30 <sup>Ba</sup>   | 6.54±0.98 <sup>Ba</sup>  | 6.17±0.20 <sup>Ba</sup>  | 6.23±0.13 <sup>Ca</sup>  | 6.26±0.08 <sup>Ba</sup>  | 6.19±0.11 <sup>Ca</sup>  | 6.08±0.61 <sup>Ca</sup>  | 6.55±0.32 <sup>Ca</sup>   |
| SC-OR  | 6.39±0.30 <sup>Ba</sup>   | 6.57±0.39 <sup>Ba</sup>  | 6.28±0.32 <sup>Ba</sup>  | 6.18±0.15 <sup>Ca</sup>  | 6.40±0.13 <sup>Ba</sup>  | 6.51±0.71 <sup>Ca</sup>  | 6.41±0.37 <sup>Ca</sup>  | 6.47±0.46 <sup>Ca</sup>   |

Note: Different capital letters (A–C) indicate that the significant differences ( $p < 0.05$ ) between different treatments at the same storage time. Different lowercase letters (a–d) indicate that the significant differences ( $p < 0.05$ ) between different storage time for same treatment. Duncan's test was used to analyze differences between groups. WC-HB indicates that the waxy corn packed in high-barrier nylon/nylon/PP composite film. WC-OR indicates that the waxy corn packed in ordinary ny-lon/nylon/PP composite film. SC-HB indicates that the sweet corn packed in high-barrier ny-lon/nylon/PP composite film. SC-OR indicates that the sweet corn packed in ordinary ny-lon/nylon/PP composite film.

**Table S7.** Changes in the content of starch in samples store at 38°C from 0 to 210 days.

| Sample | WC-HB                     | WC-OR                     | SC-HB                   | SC-OR                   |
|--------|---------------------------|---------------------------|-------------------------|-------------------------|
| 0d     | 36.74±0.99 <sup>Aa</sup>  | 36.74±0.99 <sup>Aa</sup>  | 6.39±0.30 <sup>Ba</sup> | 6.39±0.30 <sup>Ba</sup> |
| 15d    | 35.21±0.51 <sup>Aab</sup> | 33.78±0.61 <sup>Bbc</sup> | 6.56±1.08 <sup>Ca</sup> | 5.95±2.15 <sup>Ca</sup> |
| 30d    | 31.28±0.89 <sup>Ad</sup>  | 32.12±0.91 <sup>Ac</sup>  | 6.06±0.84 <sup>Ba</sup> | 6.07±0.99 <sup>Ba</sup> |
| 45d    | 30.94±0.35 <sup>Ad</sup>  | 31.15±0.11 <sup>Ad</sup>  | 5.94±0.05 <sup>Ba</sup> | 6.15±0.14 <sup>Ca</sup> |
| 60d    | 30.71±0.25 <sup>Ad</sup>  | 29.71±0.82 <sup>Ad</sup>  | 6.17±0.13 <sup>Ba</sup> | 6.14±0.11 <sup>Ba</sup> |
| 75d    | 31.35±0.46 <sup>Ad</sup>  | 29.93±0.39 <sup>Bd</sup>  | 6.19±0.07 <sup>Ca</sup> | 6.17±0.03 <sup>Ca</sup> |
| 90d    | 29.15±1.61 <sup>Bd</sup>  | 30.43±0.17 <sup>Ad</sup>  | 6.08±0.08 <sup>Ca</sup> | 5.98±0.10 <sup>Ca</sup> |
| 105d   | 36.25±1.01 <sup>Aa</sup>  | 33.15±0.92 <sup>Bbc</sup> | 6.21±0.37 <sup>Ca</sup> | 6.37±0.53 <sup>Ca</sup> |
| 120d   | 33.67±0.45 <sup>Ac</sup>  | 32.37±0.71 <sup>Bc</sup>  | 6.32±0.13 <sup>Ca</sup> | 6.13±0.27 <sup>Ca</sup> |
| 135d   | 33.24±0.92 <sup>Ac</sup>  | 32.07±0.34 <sup>Ac</sup>  | 6.29±0.42 <sup>Ba</sup> | 6.38±0.37 <sup>Ba</sup> |
| 150d   | 31.27±0.37 <sup>Ad</sup>  | 31.07±0.16 <sup>Ad</sup>  | 6.31±0.88 <sup>Ba</sup> | 6.27±0.17 <sup>Ba</sup> |
| 165d   | 29.92±0.61 <sup>Bd</sup>  | 33.27±0.57 <sup>Abc</sup> | 6.30±0.55 <sup>Ca</sup> | 6.27±0.27 <sup>Ca</sup> |
| 180d   | 31.51±0.44 <sup>Ad</sup>  | 32.54±0.95 <sup>Abc</sup> | 6.23±0.31 <sup>Ba</sup> | 6.31±0.09 <sup>Ba</sup> |
| 195d   | 31.27±0.54 <sup>Ad</sup>  | 30.90±0.42 <sup>Ad</sup>  | 6.01±0.24 <sup>Ba</sup> | 6.18±0.30 <sup>Ba</sup> |
| 210d   | 34.16±0.84 <sup>Abc</sup> | 34.25±0.82 <sup>Ab</sup>  | 6.33±0.76 <sup>Ba</sup> | 6.26±0.21 <sup>Ba</sup> |

Note: Different capital letters (A–C) indicate that the significant differences ( $p < 0.05$ ) between different treatments at the same storage time. Different lowercase letters (a–d) indicate that the significant differences ( $p < 0.05$ ) between different storage time for same treatment. Duncan's test was used to analyze differences between groups. WC-HB indicates that the waxy corn packed in high-barrier nylon/nylon/PP composite film. WC-OR indicates that the waxy corn packed in ordinary ny-lon/nylon/PP composite film. SC-HB indicates that the sweet corn packed in high-barrier ny-lon/nylon/PP composite film. SC-OR indicates that the sweet corn packed in ordinary ny-lon/nylon/PP composite film.
